# Supplementary material for: A reduced-complexity model for river delta formation – Part 1: Modeling deltas with channel dynamics
Source: Copernicus journal article supplement (doi:10.5194/esurf-3-67-2015), 2015-01-28

Supplement of Earth Surf. Dynam., 3, 67–86, 2015  
<http://www.earth-surf-dynam.net/3/67/2015/>  
doi:10.5194/esurf-3-67-2015-supplement  
© Author(s) 2015. CC Attribution 3.0 License.

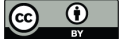

*Supplement of*

## **A reduced-complexity model for river delta formation – Part 1: Modeling deltas with channel dynamics**

**M. Liang et al.**

*Correspondence to:* M. Liang (manliang@utexas.edu)

## Supplement document

1. The effects of topographic diffusion ( $\alpha$ ).

Default value:  $\alpha = 0.1$ .

- Run S1: 100% sand, default value;

- Run S1a: 100% sand,  $\alpha = 0$ .

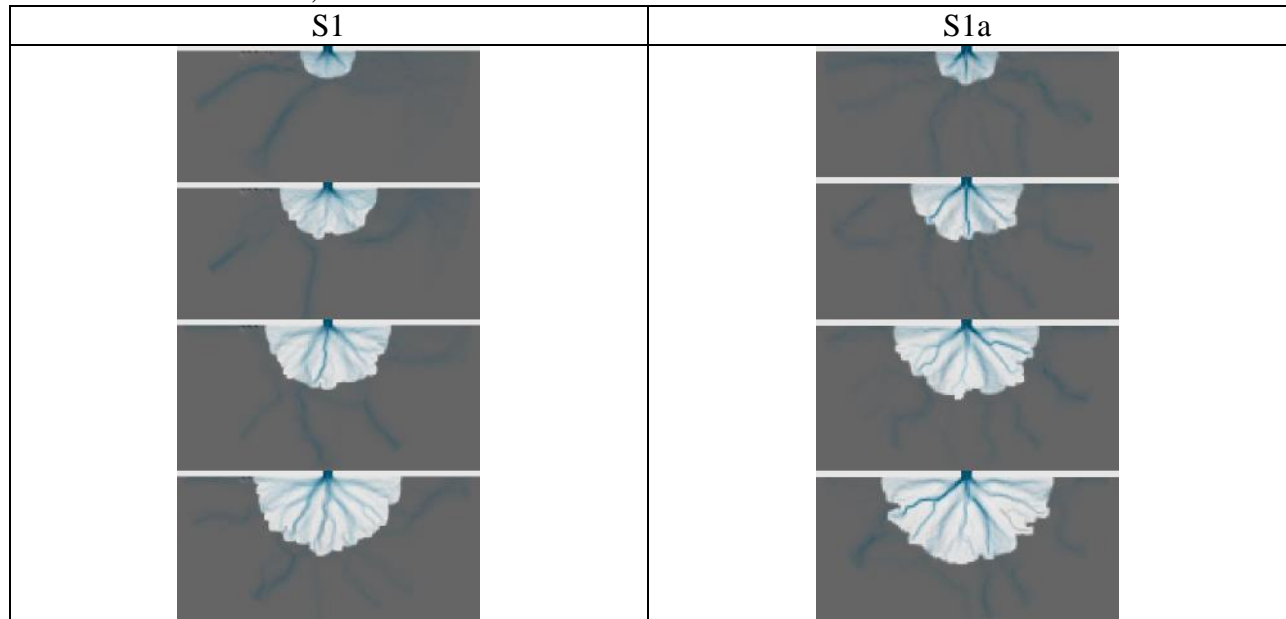

2. The effects of threshold velocity for mud parcels ( $U_{dep}$ ,  $U_{ero}$ )

Default value:  $U_{dep} = 0.3 * U_0$ ,  $U_{ero} = 1.5 * U_0$

- Run S2: 0% sand, default value;

- Run S2a: 0% sand,  $U_{dep} = 0.15 * U_0$ ,  $U_{ero} = 1.8 * U_0$ ;

- Run S2b: 0% sand,  $U_{dep} = 0.6 * U_0$ ,  $U_{ero} = 1.2 * U_0$ .

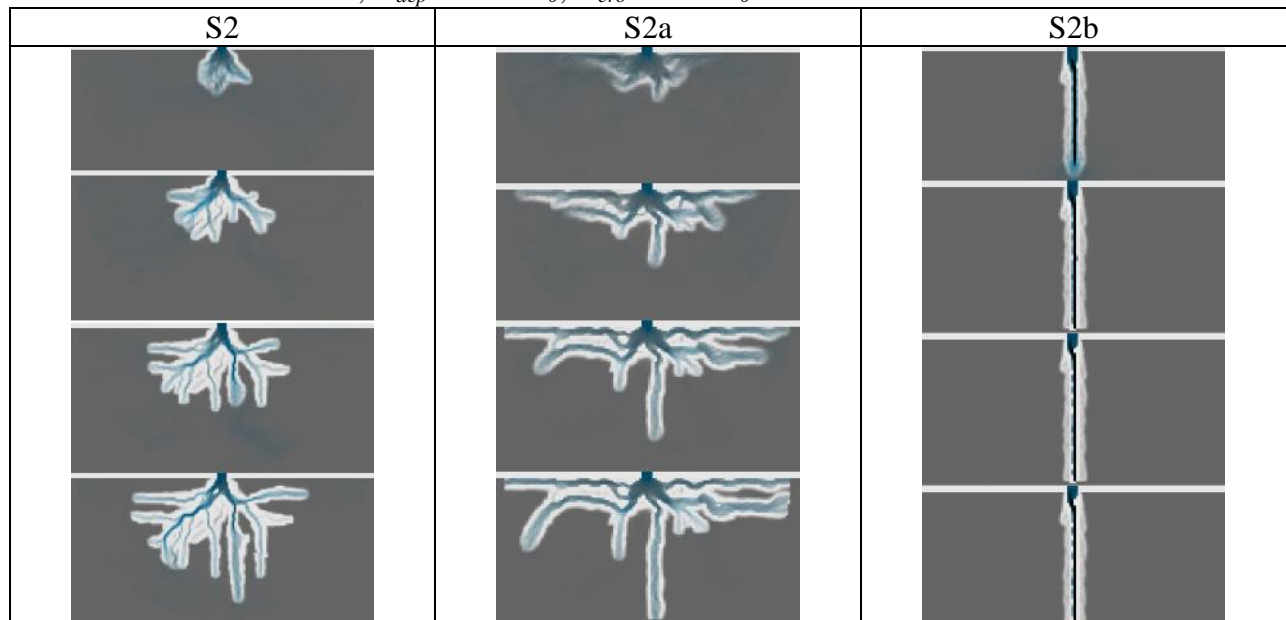

3. The effects of depth dependence in routing water and sediment ( $\theta$ )

Default value: 1.0-water, 1.0-mud, 2.0-sand.

- Run S3: 50% sand, default value;
- Run S3a: 50% sand, 1.5; 1.5; 3.0;
- Run S3b: 50% sand, 1.0; 1.0; 1.0.

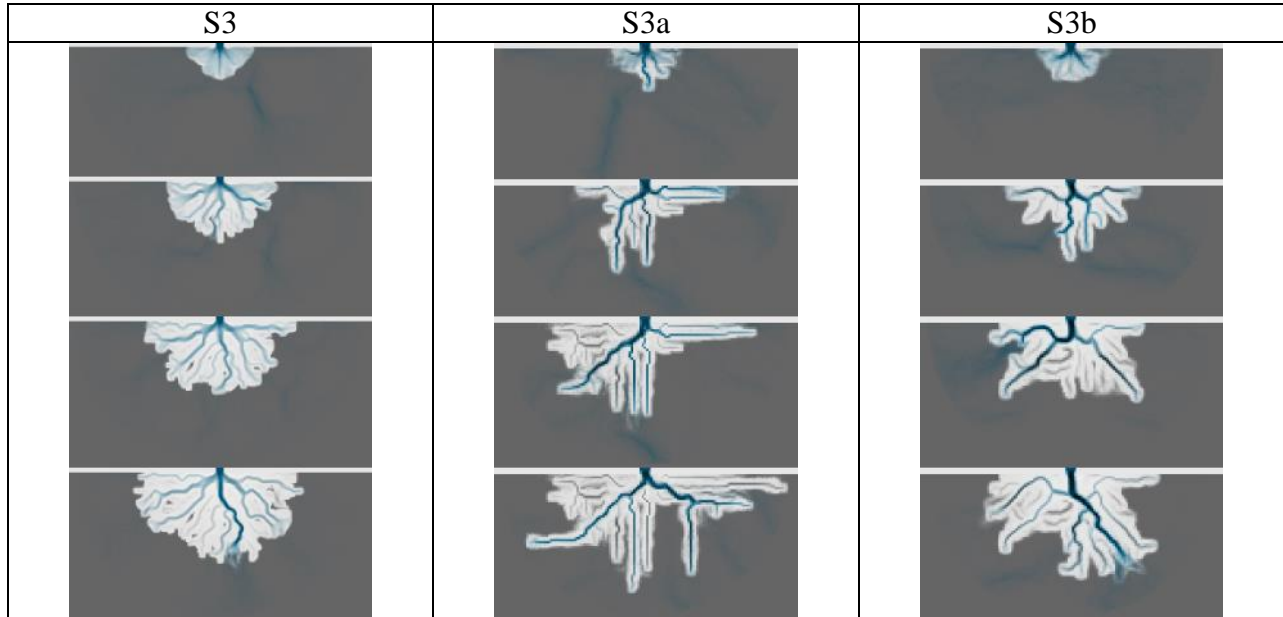

4. The effects of partitioning between routing by water surface and routing by flow inertia ( $\gamma$ ).

- Run S4a: 0% sand,  $\gamma = 0.02$ ;
- Run S4b: 0% sand,  $\gamma = 0.05$ ;
- Run S4c: 0% sand,  $\gamma = 0.15$ ;
- Run S4d: 100% sand,  $\gamma = 0.02$ ;
- Run S4e: 100% sand,  $\gamma = 0.05$ ;
- Run S4f: 100% sand,  $\gamma = 0.15$ .

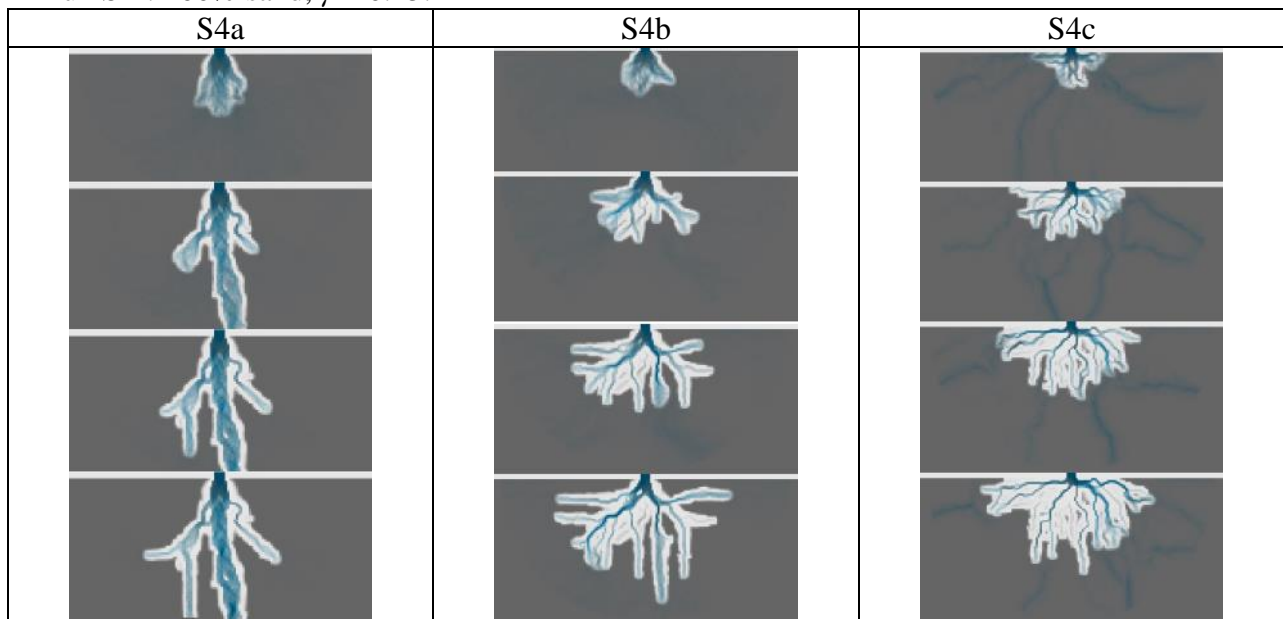

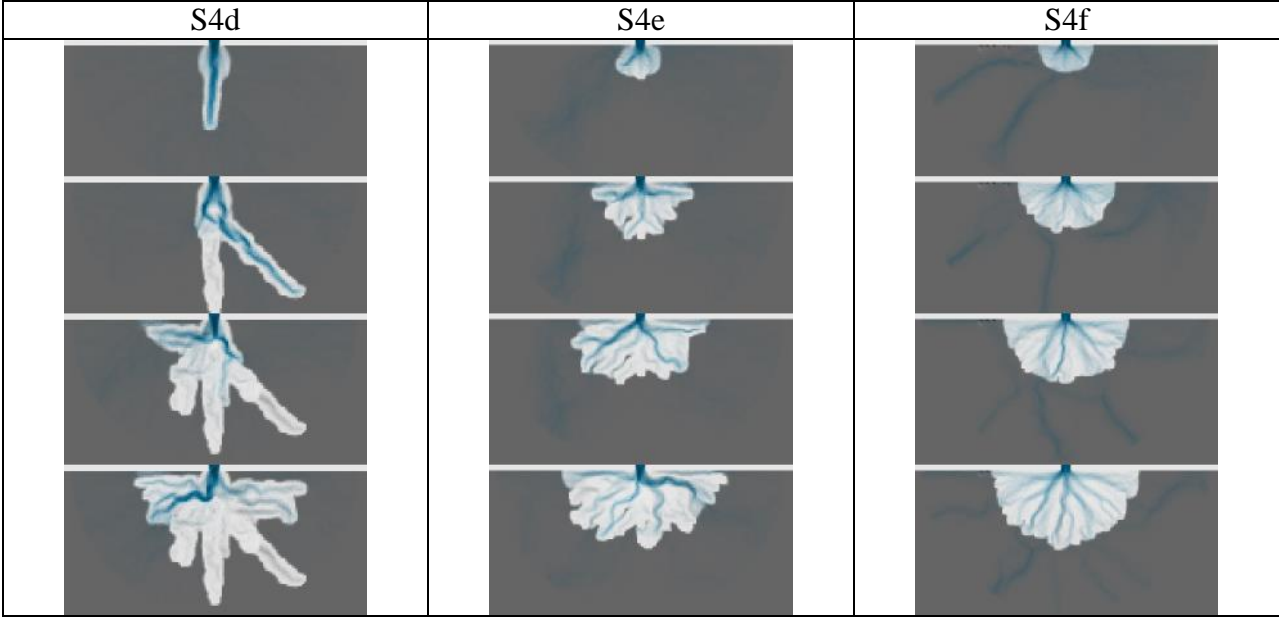

Supplement: Supplementary file 1 [file esurf-3-67-2015-supplement.pdf]
